# Supplementary material for: A highly crystalline Nb3O7F nanostructured photoelectrode: fabrication and photosensitisation
Source: Royal Society of Chemistry journal article supplement (doi:10.1039/c3ta11042g), 2013-01-01
Supplement: c3ta11042g.pdf [file c3ta11042g.pdf]

## Supporting Information

### A highly crystalline Nb<sub>3</sub>O<sub>7</sub>F nanostructured photoelectrode: fabrication and photosensitisation

Haimin Zhang,<sup>a</sup> Yibing Li,<sup>a</sup> Yun Wang,<sup>a</sup> Porun Liu,<sup>a</sup> Huagui Yang,<sup>a</sup> Xiangdong Yao,<sup>c</sup> Taicheng An,<sup>d</sup> Barry J. Wood,<sup>e</sup> and Huijun Zhao<sup>\*a,b</sup>

<sup>a</sup> Centre for Clean Environment and Energy, Griffith University, Gold Coast Campus, QLD 4222, Australia

<sup>b</sup> Centre for Environmental and Energy Nanomaterials, Institutes of Solid State Physics, Chinese Academy of Sciences, Hefei 230031, China

<sup>c</sup> QLD Micro- and Nanotechnology Centre, Griffith University, Nathan Campus, QLD 4111, Australia

<sup>d</sup> State Key Laboratory of Organic Geochemistry, Guangzhou Institute of Geochemistry, Chinese Academy of Sciences, Guangzhou 510640, China

<sup>e</sup> Centre for Microscopy & Microanalysis, The University of Queensland, St Lucia, QLD 4072, Australia

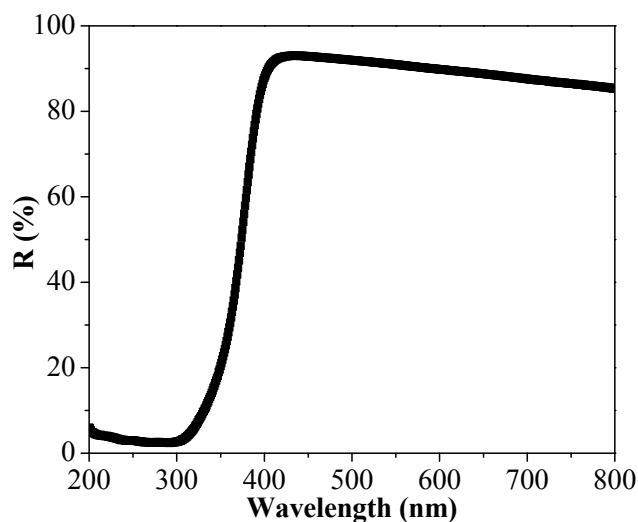

**Figure SI-1.** UV-vis diffuse reflectance spectra of the as-synthesised Nb<sub>3</sub>O<sub>7</sub>F nanostructured film.

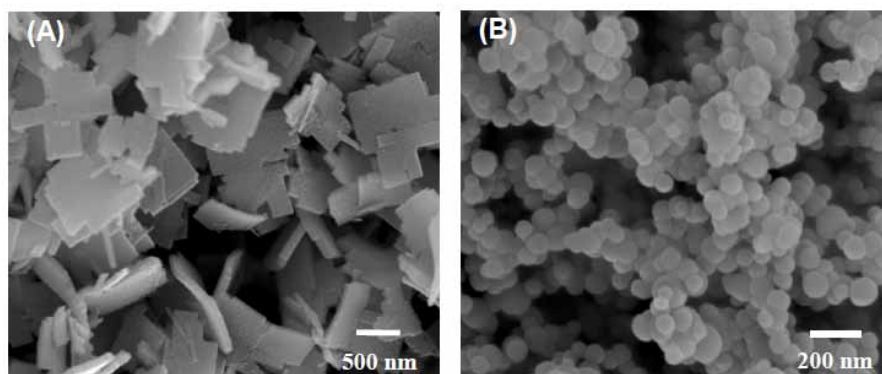

**Figure SI-2.** (A) and (B) SEM images of the as-synthesised samples obtained in 40 mL of 0.5% and 3.0% (v/v) HF solutions, respectively;  $\text{NbCl}_5$  concentration of 0.05 M, hydrothermal reaction temperature of 200 °C and reaction time of 3 h.

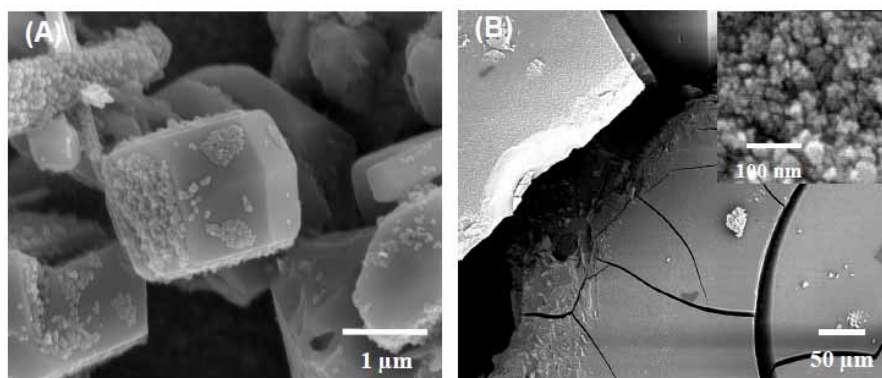

**Figure SI-3.** (A) and (B) SEM images of the as-synthesised samples with the  $\text{NbCl}_5$  precursor concentrations of 0.01 M and 0.1 M, respectively; 40 mL of 1.0% (v/v) HF solution, hydrothermal reaction temperature of 200 °C and reaction time of 3 h.

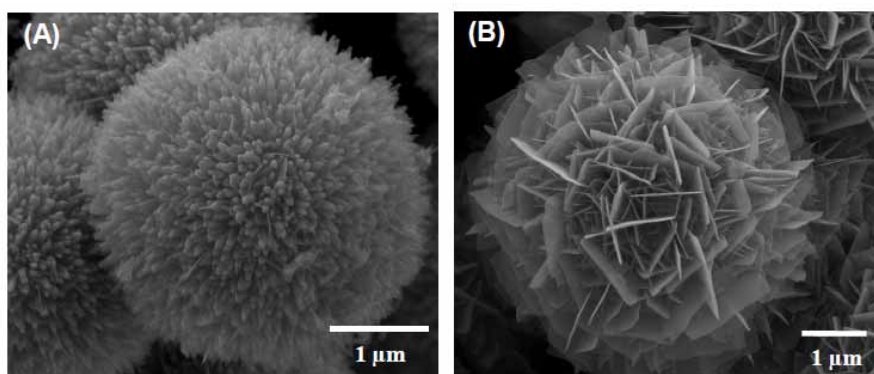

**Figure SI-4.** (A) and (B) SEM images of the as-synthesised samples obtained at 150 °C and 180 °C for 3 h, respectively;  $\text{NbCl}_5$  concentration of 0.05 M and 40 mL of 1.0% (v/v) HF solution.

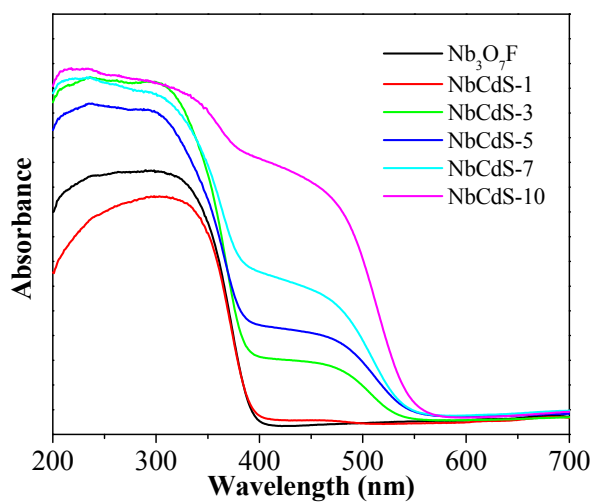

**Figure SI-5.** UV-vis diffuse reflectance spectra of the  $\text{Nb}_3\text{O}_7\text{F}$  film and NbCdS series films with different CBD cycles.

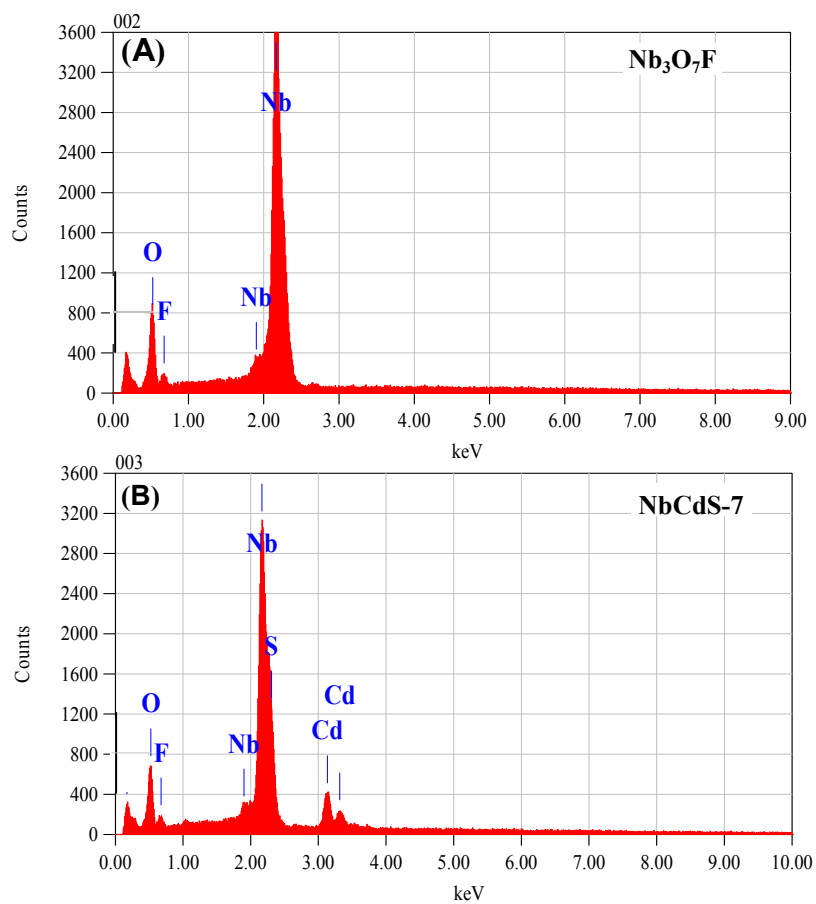

**Figure SI-6.** Energy dispersive spectroscopy (EDS) of the  $\text{Nb}_3\text{O}_7\text{F}$  films before (A) and after (B) CdS sensitisation with 7 CBD cycles.

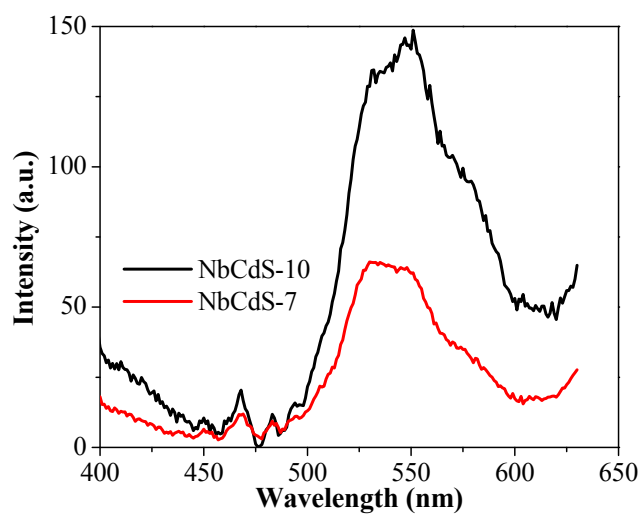

**Figure SI-7.** PL spectra of the NbCdS-7 and NbCdS-10 photoanodes.

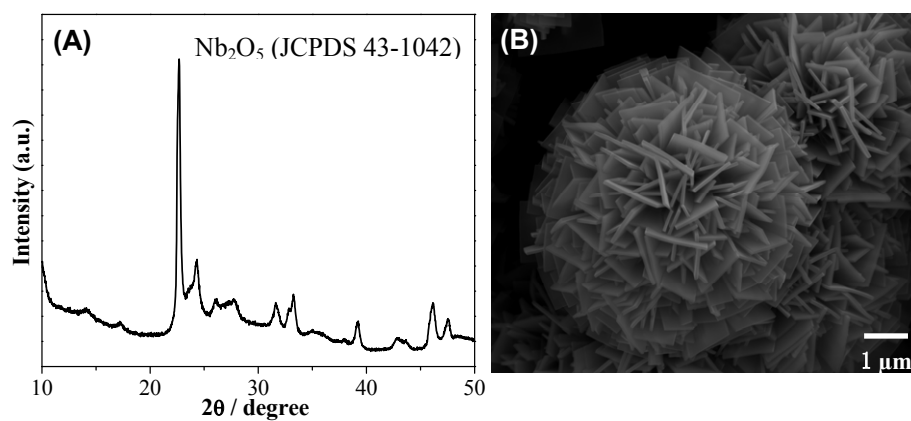

**Figure SI-8.** (A) XRD pattern of the calcined sample at 550 °C for 2 h. (B) Surface SEM image of the calcined sample.

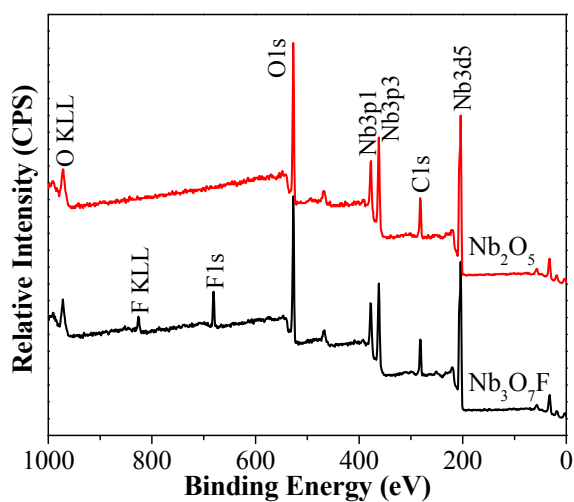

**Figure SI-9.** XPS survey spectra of the Nb<sub>3</sub>O<sub>7</sub>F samples before and after calcination at 550 °C for 2 h.

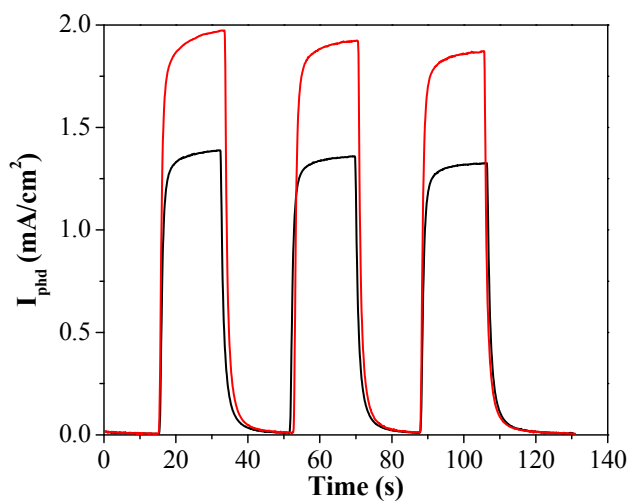

**Figure SI-10.** Photocurrent versus time measurements of NbCdS-7 (red curve) and Nb<sub>2</sub>O<sub>5</sub>/CdS-7 (black curve) photoanodes obtained at -0.6 V of applied potential.

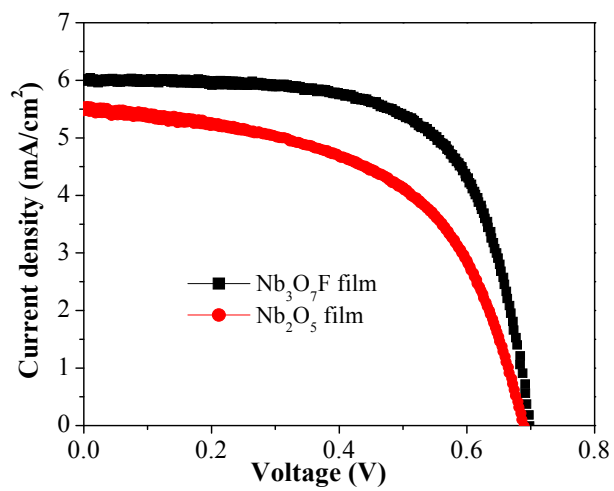

**Figure SI-11.** Photocurrent as a function of photovoltage for DSSCs assembled with the Nb<sub>3</sub>O<sub>7</sub>F and Nb<sub>2</sub>O<sub>5</sub> nanostructured films.
